# Supplementary material
Source: publisher figshare collection journal article supplement (https://frontiersin.figshare.com/ndownloader/files/25485146)
Supplement: Supplementary file [file 25485146]

[illegible]
